# Supplementary material
Source: PubMed Central journal article supplement (PMC7185564)
Supplement: mmc1.pdf [file mmc1.pdf]

**Cell Reports, Volume 21**

**Supplemental Information**

**Extensive Homeostatic T Cell Phenotypic**

**Variation within the Collaborative Cross**

**Jessica B. Graham, Jessica L. Swarts, Michael Mooney, Gabrielle Choonoo, Sophia Jeng, Darla R. Miller, Martin T. Ferris, Shannon McWeeney, and Jennifer M. Lund**

A

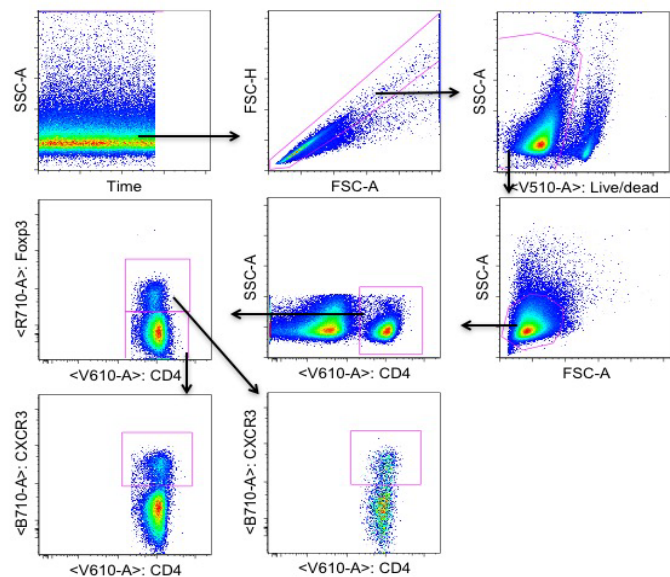

B

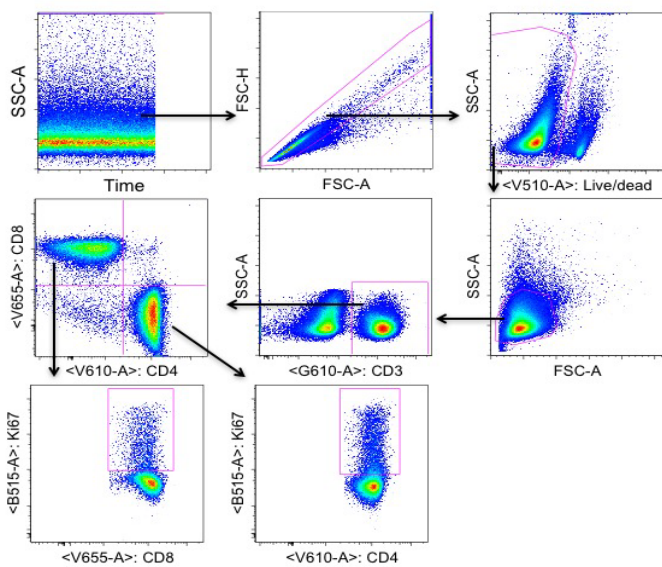

C

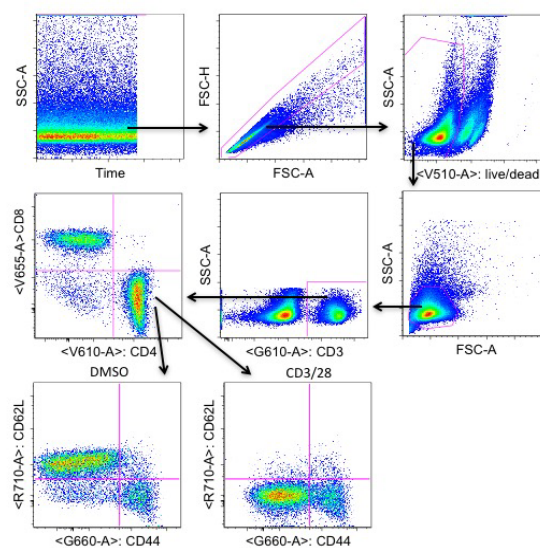

**Supplemental Figure 1. Gating scheme for flow cytometry panels, related to Figs. 1-3.** (a) Regulatory T Cell panel. The panel is gated in the following order: time, singlets, live, lymphocytes, CD4+, CD4+ Foxp3-, CD4+ Foxp3+, CD4+ Foxp3- CXCR3+, and CD4+ Foxp3+ CXCR3+. (b) T cell panel. The panel is gated in the following order: time, singlets, live, lymphocytes, CD3+, CD4+ and CD8+, CD8+ Ki67+, and CD4+ Ki67+. (c) Intracellular cytokine panel. The panel is gated in the following order: time, singlets, live, lymphocytes, CD3+, CD4+, CD62L versus CD44 (DMSO stimulation), and CD62L versus CD44 (anti-CD3/28 stimulation)

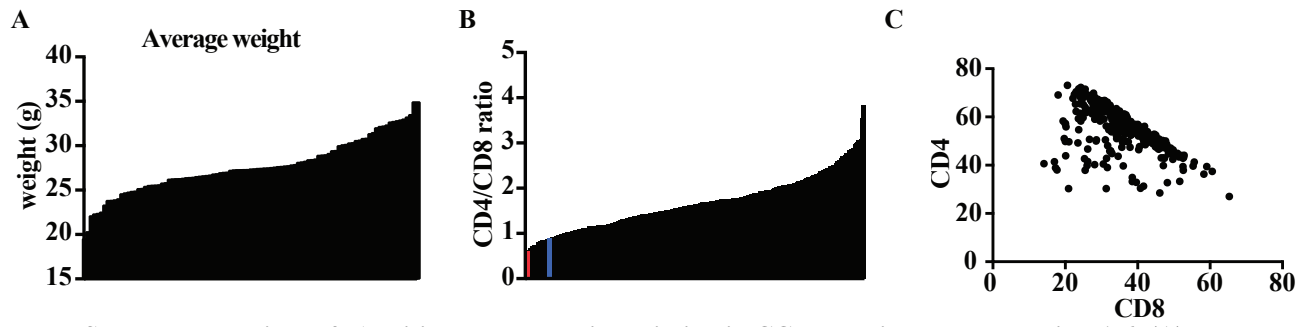

**Supplemental Figure 2. Additional phenotypic variation in CC-RIX mice, related to Figs. 1-6.** (A) Weight variability of CC-RIX mice at steady state at similar ages (8-10 weeks old). (B) CD4/CD8 ratio and (C) CD4 vs CD8 scatter plot for all CC-RIX lines in the screen.

# Tregs vs % of CD8 T cells that are Ki67+

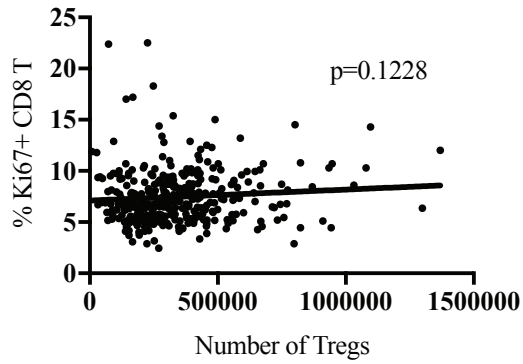

# Tregs vs % of CD4 T cells that are Ki67+

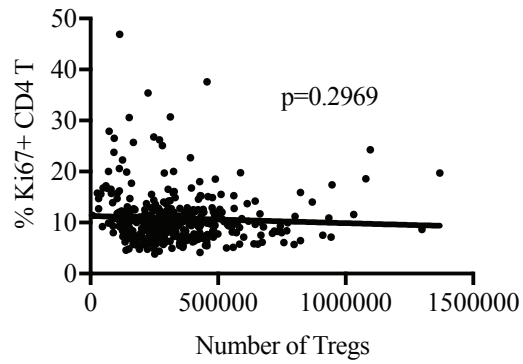

# Tregs vs % of CD8 T cells that are CD62L-

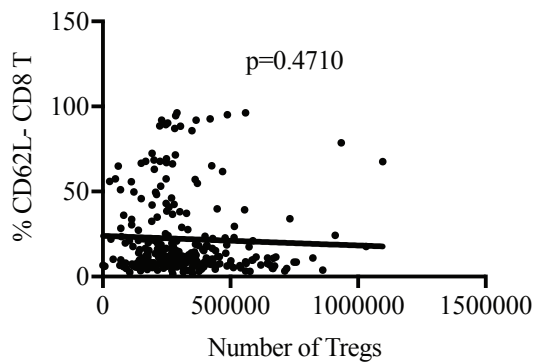

# Tregs vs % of CD4 T cells that are CD62L-

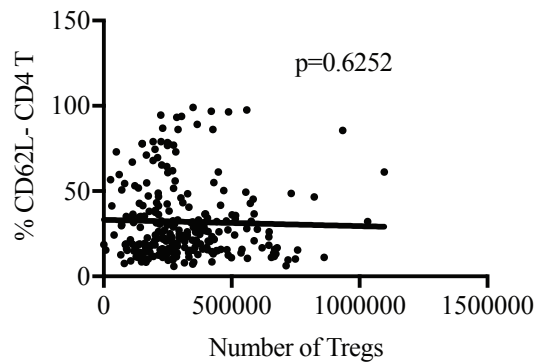

# Tregs vs % of CD8 T cells that are CD44+

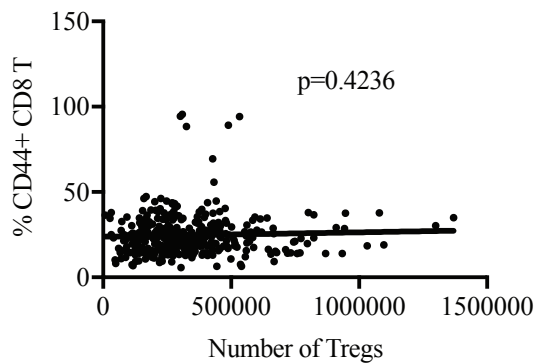

# Tregs vs % of CD4 T cells that are CD44+

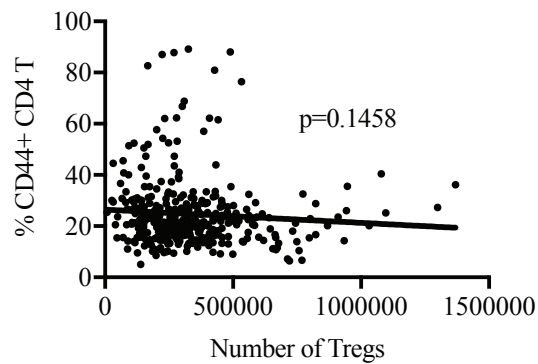

**Supplemental Figure 3, related to Fig. 3.** Correlations between the number of Tregs in the spleen and the frequency of Ki67+ (proliferated) CD8 or CD4 T cells, CD62L- (activated) CD8 or CD4 T cells, or CD44+ (memory phenotype) CD8 or CD4 T cells.

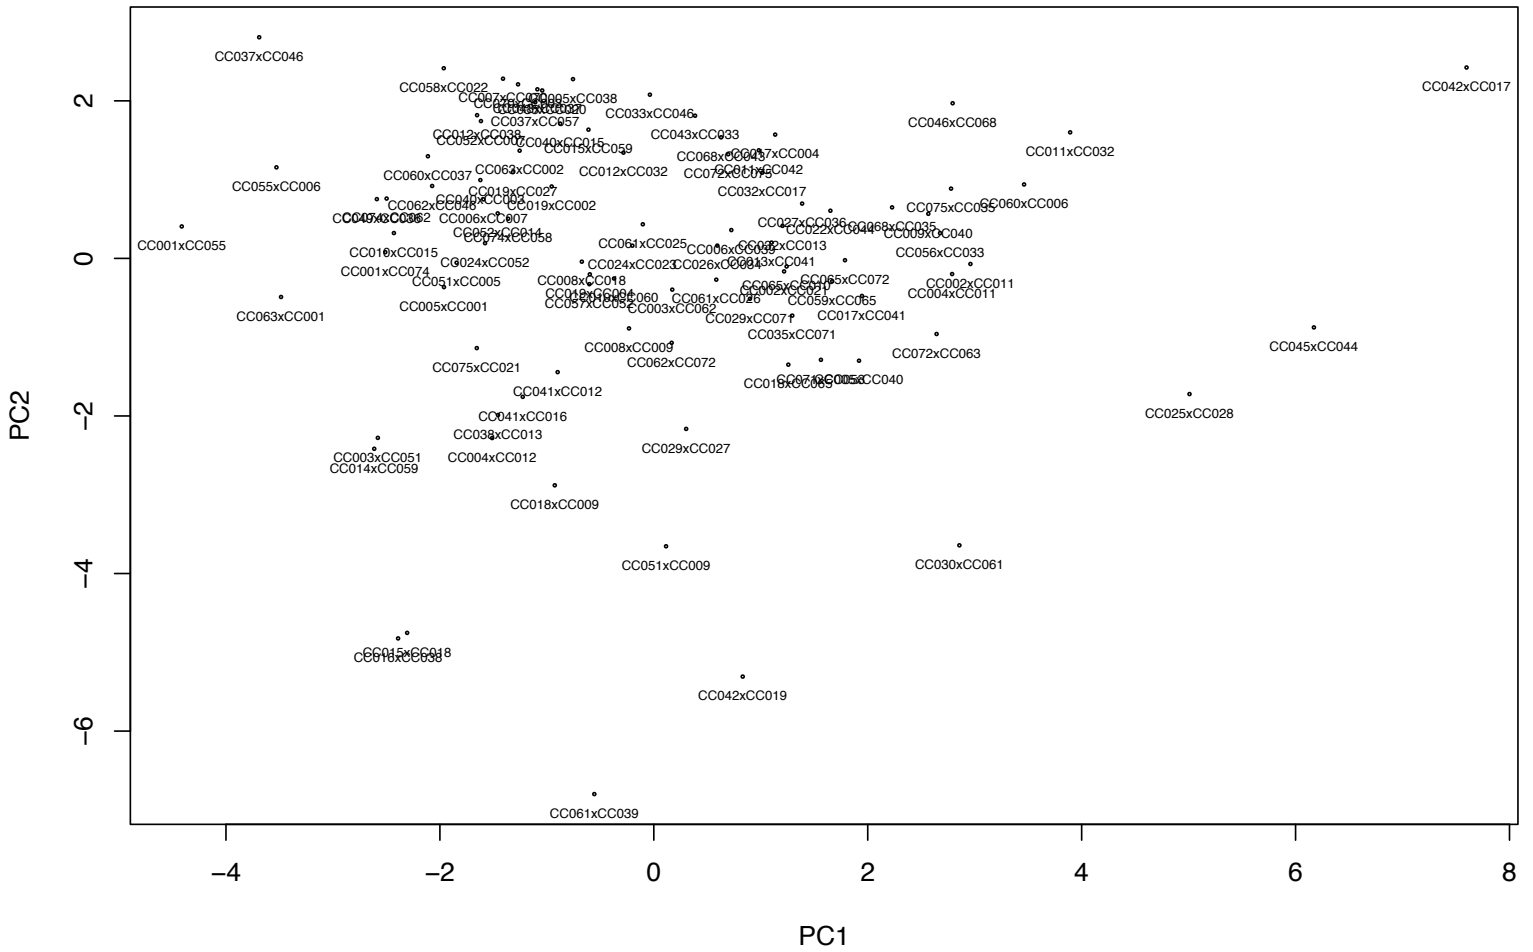

**Supplemental Figure 4, related to Figs. 1-3 and Supp. Table 4.** Principal Component Analysis was performed to demonstrate the overall immune system phenotypic diversity among CC-RIX lines. The first two principal components (PCs) explained 19.8% and 14.2% of the total phenotypic variance, respectively. The top 3 phenotypes contributing to PC1 are frequency of Ki67+ CD4+ T cells (contributing 11.9%), frequency of CD4+ cells (11.2%), and frequency of CD3+ T cells (9.8%). The top 3 phenotypes contributing to PC2 are frequency of CD4+ T cells (ICS panel, CD3CD28 stimulation) (16.8%), frequency of TNFA- IFNG+ CD4+ T cells (ICS panel, CD3CD28 stimulation) (10.9%), and frequency of TNFA- IFNG+ CD8+ T cells (ICS panel, CD3CD28 stimulation) (10.6%).

| <b>Supplementary Table 1. T cell phenotypes identified in RIX screen, related to Figs. 1-3</b> |                                                           |
|------------------------------------------------------------------------------------------------|-----------------------------------------------------------|
| <b>PHENOTYPE</b>                                                                               | <b>MARKERS</b>                                            |
| Total T cells                                                                                  | CD3+                                                      |
| CD4 T                                                                                          | CD3+CD4+                                                  |
| CD8 T                                                                                          | CD3+CD8+                                                  |
| Regulatory T                                                                                   | CD3+CD4+Foxp3+                                            |
| Tissue-migrating T                                                                             | CD4+, CD8+, or Foxp3+ CCR5+, CXCR3+, or CD29+             |
| Central memory T                                                                               | CD4+ or CD8+ CD44+CCR7+CD62L+                             |
| Effector memory T                                                                              | CD4+ or CD8+ CD44+CCR7-CD62L-                             |
| Memory/Ag experienced T                                                                        | CD4+, CD8+, or Foxp3+ CD44-hi                             |
| Naïve T                                                                                        | CD4+ or CD8+ CD44-CD62L+                                  |
| Tissue-resident memory T                                                                       | CD4+ or CD8+ CD44-hi CD69+ and/or CD103+                  |
| Activated T                                                                                    | CD4+ or CD8+ combo of CD25+, ICOS+, CTLA-4+, Ki67+,CD62L- |
| Activated Treg                                                                                 | CD73+, CTLA-4+, or ICOS+ CD4+Foxp3+ cells                 |
| Th17                                                                                           | CD4+ IL-17+                                               |
| Proliferating T                                                                                | CD4+ or CD8+ Ki67+                                        |
| Activated Th1                                                                                  | CD4+Ly6C+PSGL-1+                                          |
| Follicular helper T                                                                            | CD4+Ly6C-PSGL-1-                                          |
| Th1                                                                                            | CD4+Tbet+ and/or IFNg+                                    |
| Cytokine producing T                                                                           | CD4+ or CD8+ TNFa+ and/or IFNg+                           |
| Short-lived effector T                                                                         | CD8+CD44+KLRG-1+CD127-                                    |
| Memory precursor T                                                                             | CD8+CD44+KLRG-1-CD127+                                    |

**Supplementary Table 2. RIX line information, related to Figs. 1-3.***H2b b*, Strain carries H2b from B6 or 129*H2b Nonb*, Strain carries H2b from A/J, NOD, NZO, CAST, PWK, or WSB*H2b het*, One strain was H2b b (B6 or 129) and one strain was Nonb*H2b\**, One strain was segregating H2b from both b and Nonb*H2b#*, One strain was recombinant in the H2b region between b and Nonb

| Line        | H2b status | Average weight (g) | Line        | H2b status | Average weight (g) |
|-------------|------------|--------------------|-------------|------------|--------------------|
| CC001xCC055 | H2b het    | 24.63              | CC032xCC013 | H2b het    | 26.94              |
| CC001xCC074 | H2b het    | ND                 | CC032xCC017 | H2b het    | 27.66              |
| CC002xCC011 | H2b het    | 27.78              | CC033xCC046 | H2b Nonb   | 27.43              |
| CC002xCC021 | H2b het    | ND                 | CC033xCC068 | H2b het    | 27.23              |
| CC003xCC051 | H2b#       | 26.9               | CC034xCC016 | H2b het    | ND                 |
| CC003xCC062 | H2b het    | 26.46              | CC035xCC020 | H2b het    | 27.42              |
| CC004xCC011 | H2bb       | 30.28              | CC035xCC071 | H2b Nonb   | ND                 |
| CC004xCC012 | H2bb       | 27.67              | CC036xCC051 | H2b#       | 29.07              |
| CC005xCC001 | H2b het    | 25.14              | CC037xCC046 | H2b het    | 31.31              |
| CC005xCC038 | H2b het    | ND                 | CC037xCC057 | H2b het    | 31.43              |
| CC005xCC040 | H2b het    | 27.23              | CC038xCC013 | H2b het    | 27.49              |
| CC006xCC007 | H2b*       | 27.27              | CC039xCC020 | H2b het    | 26.37              |
| CC006xCC039 | H2b*       | 27.27              | CC040xCC003 | H2b het    | 33.18              |
| CC007xCC070 | H2b*       | 33.45              | CC040xCC015 | H2b het    | 29.4               |
| CC007xCC075 | H2b het    | 32.84              | CC041xCC012 | H2b het    | 25.46              |
| CC008xCC009 | H2b Nonb   | 27.61              | CC041xCC016 | H2b het    | 27.18              |
| CC008xCC010 | H2b het    | 32.12              | CC042xCC017 | H2b het    | 26.6               |
| CC008xCC018 | H2b het    | 30.54              | CC042xCC019 | H2b het    | 23.78              |
| CC009xCC040 | H2b het    | 32.62              | CC042xCC025 | H2b het    | ND                 |
| CC010xCC015 | H2b het    | 30.25              | CC043xCC033 | H2b Nonb   | 28.39              |
| CC010xCC060 | H2b het    | 30.77              | CC043xCC037 | H2b het    | 23.27              |
| CC011xCC032 | H2b het    | 28.9               | CC044xCC060 | H2b*       | 25.37              |
| CC011xCC042 | H2b het    | 25.12              | CC045xCC044 | H2b*       | 24.72              |
| CC012xCC032 | H2b het    | 26.21              | CC046xCC068 | H2b het    | 28.45              |
| CC012xCC038 | H2b het    | 25.48              | CC049xCC036 | H2b Nonb   | 27.82              |
| CC013xCC026 | H2b Nonb   | ND                 | CC051xCC005 | H2b#       | 28.88              |
| CC013xCC041 | H2b het    | 28.07              | CC051xCC009 | H2b#       | 30.78              |
| CC014xCC059 | H2b#       | 25.73              | CC052xCC007 | H2b het    | 24.82              |
| CC015xCC018 | H2b het    | 23.78              | CC052xCC014 | H2b het    | 28.2               |
| CC015xCC059 | H2b#       | 26.23              | CC055xCC006 | H2b*       | 30.1               |

|             |          |       |             |          |       |
|-------------|----------|-------|-------------|----------|-------|
| CC016xCC038 | H2b het  | 27.33 | CC055xCC028 | H2b het  | 34.88 |
| CC016xCC061 | H2b het  | 26.38 | CC056xCC033 | H2b#     | 27.53 |
| CC017xCC004 | H2b het  | 25.49 | CC057xCC052 | H2b het  | 27.33 |
| CC017xCC041 | H2b het  | 26.55 | CC058xCC022 | H2b Nonb | 27.38 |
| CC018xCC009 | H2b het  | 28.37 | CC059xCC065 | H2b#     | 32.75 |
| CC018xCC065 | H2b het  | 26.29 | CC060xCC006 | H2b*     | 26.76 |
| CC019xCC002 | H2b het  | 27.59 | CC060xCC037 | H2b het  | 25.54 |
| CC019xCC004 | H2b het  | 19.46 | CC061xCC025 | H2b het  | 23.85 |
| CC019xCC027 | H2b*     | 22.26 | CC061xCC026 | H2b het  | 23.96 |
| CC020xCC008 | H2b het  | 32.28 | CC061xCC039 | H2b het  | 22.32 |
| CC021xCC023 | H2b het  | 26.5  | CC062xCC046 | Non      | 31.96 |
| CC022xCC024 | H2b Nonb | ND    | CC062xCC072 | H2b het  | 30.06 |
| CC022xCC044 | H2b*     | 20.26 | CC063xCC001 | H2b het  | 26.79 |
| CC023xCC025 | H2b het  | 29.38 | CC063xCC002 | H2b het  | 26.64 |
| CC024xCC023 | H2b het  | 26.94 | CC065xCC010 | H2b het  | 32.95 |
| CC024xCC052 | H2b het  | ND    | CC065xCC072 | H2b het  | 32.15 |
| CC025xCC028 | H2b het  | 29.95 | CC068xCC035 | H2b het  | ND    |
| CC026xCC034 | H2b het  | 25.79 | CC068xCC043 | H2b het  | 27.22 |
| CC026xCC042 | H2b het  | ND    | CC070xCC003 | H2b*     | 28.87 |
| CC027xCC036 | H2b*     | ND    | CC071xCC058 | H2b Nonb | ND    |
| CC027xCC045 | H2b*     | 24.53 | CC072xCC063 | H2b het  | 28.12 |
| CC028xCC024 | H2b het  | 30.57 | CC072xCC075 | H2b het  | 32.67 |
| CC028xCC030 | H2b het  | ND    | CC074xCC058 | H2b Nonb | 27.38 |
| CC029xCC027 | H2b*     | 22.06 | CC074xCC062 | H2b Nonb | 22.47 |
| CC029xCC071 | H2b Nonb | ND    | CC075xCC021 | H2b het  | 24.8  |
| CC030xCC023 | H2b het  | 26.35 | CC075xCC035 | H2b het  | 26.18 |
| CC030xCC061 | H2b het  | 26.2  |             |          |       |



**Supplementary Table 3. Metrics of phenotypic dispersion, related to Figs. 1-3.**  
*All values represent frequency of parent population as determined by flow cytometry*

| <b>Phenotype</b>                                                   | <b>Min.</b>          | <b>Max.</b>        | <b>Median</b>      | <b>mean</b>          | <b>B6<br/>mean/SD</b> | <b>Balb/c<br/>mean/SD</b> |
|--------------------------------------------------------------------|----------------------|--------------------|--------------------|----------------------|-----------------------|---------------------------|
| Total Cell Count                                                   | 8.64x10 <sup>5</sup> | 65x10 <sup>5</sup> | 25x10 <sup>6</sup> | 26.6x10 <sup>6</sup> |                       |                           |
| Frequency of Tregs                                                 | 1.82                 | 25.5               | 7.525              | 8.2                  | 10.0/1.00             | 12.52/0.58                |
| Frequency of CD29+ Tregs                                           | 8.84                 | 95.6               | 35.55              | 38.8                 | 32.22/2.45            | 29.90/0.89                |
| Frequency of CD44-hi Tregs                                         | 21.1                 | 93                 | 56.55              | 56.2                 | 39.52/3.46            | 44.28/1.61                |
| Frequency of CD73+ Tregs                                           | 3.49                 | 97.8               | 56.15              | 56.1                 | 81.12/1.2             | 51.96/2.38                |
| Frequency of CTLA-4+ Tregs                                         | 11.2                 | 86.2               | 45.05              | 45.3                 | 46.18/1.35            | 34.08/1.69                |
| Frequency of CXCR3+ Tregs                                          | 0.325                | 72.2               | 19.7               | 20.1                 | 24.02/1.35            | 20.12/1.70                |
| Frequency of ICOS+ Tregs                                           | 0.0138               | 64.1               | 18.1               | 20.4                 | 12.48/1.06            | 12.2/0.90                 |
| Frequency of CD8+ T cells                                          | 14.1                 | 65.3               | 34.6               | 35.6                 | 36.62/0.87            | 32.07/0.90                |
| Frequency of CD44+ CD8 T cells                                     | 5.75                 | 95.5               | 22.8               | 24.7                 | 21.4/1.0              | 22.6/0.80                 |
| Frequency of CD62Lneg CD8 T cells                                  | 1.53                 | 96.2               | 11.8               | 22.1                 | 3.58/0.39             | 3.00/0.20                 |
| Frequency of Ki67+ CD8 T cells                                     | 2.45                 | 22.5               | 6.92               | 7.5                  | 10.83/1.05            | 7.24/0.53                 |
| Frequency of CD4+ T cells                                          | 27                   | 73.1               | 56.7               | 55.2                 | 58.96/0.66            | 64.50/0.82                |
| Frequency of CD44+ CD4+ T cells                                    | 5.03                 | 89.2               | 21.7               | 24.7                 | 16.68/1.29            | 21.940/1.12               |
| Frequency of CD62Lneg CD4+ T cells                                 | 5.84                 | 99.1               | 24.2               | 32.0                 | 11.5/1.3              | 8.75/0.61                 |
| Frequency of Ki67+ CD4+ T cells                                    | 3.87                 | 46.9               | 9.88               | 10.8                 | 8.924/0.591           | 8.554/0.233               |
| Frequency of IL-17+ CD8+ T cells after polyclonal stimulus         | 0                    | 11.3               | 0.2025             | 0.5                  | 0.0567/0.01           | 0.07664/0.01              |
| Frequency of TNFanegIFNgpos CD8+ T cells after polyclonal stimulus | 0                    | 33.1               | 0.1805             | 1.1                  | 0.05362/0.02          | 0.12064/0.02              |
| Frequency of IL-17+ CD4+ T cells after polyclonal stimulus         | 0                    | 12.9               | 0.2865             | 0.8                  | 0.02188/0.02          | 0.01944/0.01              |
| Frequency of Tbet+ CD4+ T cells after polyclonal stimulus          | 0                    | 35.1               | 1.53               | 3.3                  | 2.53/0.29             | 2.38/0.29                 |
| Frequency of TNFanegIFNgpos CD4+ T cells after polyclonal stimulus | 0                    | 41.2               | 0.101              | 1.5                  | 0.05138/0.01          | 0.06968/0.01              |
